# Supplementary material for: MIND bomb 2 prevents RIPK1 kinase activity-dependent and -independent apoptosis through ubiquitylation of cFLIPL
Source: PubMed Central journal article supplement (PMC7815719; doi:10.1038/s42003-020-01603-y), 2021-01-19

**MIND bomb 2 prevents RIPK1 kinase activity-dependent and -independent  
apoptosis through ubiquitylation of cFLIP<sub>L</sub>**

Osamu Nakabayashi, Hirotaka Takahashi, Kenta Moriwaki, Sachiko Komazawa-Sakon,  
Fumiaki Ohtake, Shin Murai, Yuichi Tsuchiya, Yuki Koyahara, Yasushi Saeki, Yukiko  
Yoshida, Soh Yamazaki, Fuminori Tokunaga, Tatsuya Sawasaki, Hiroyasu Nakano

**Supplementary Materials**

**Supplementary Figures 1~20**

**Supplementary Data Files 1~8**

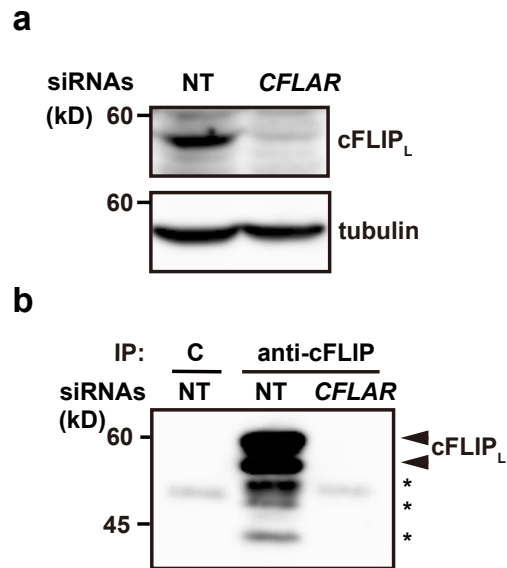

**Supplementary Fig. 1 Immunoprecipitates with anti-cFLIP antibody exhibit multiple bands of cFLIP<sub>L</sub>.** WT HeLa cells were transfected with non-target (NT) or *CFLAR* siRNAs. Knockdown of cFLIP<sub>L</sub> by *CFLAR* siRNA was verified by immunoblotting (**a**). After transfection, cells were immunoprecipitated with control IgGs (C) or anti-cFLIP antibody, and the immunoprecipitates were analyzed by anti-cFLIP antibody (**b**). The upper and lower arrowheads indicate modified and unmodified cFLIP<sub>L</sub>, respectively. Asterisks indicate degraded bands of cFLIP<sub>L</sub>. Results are representative of two independent experiments.

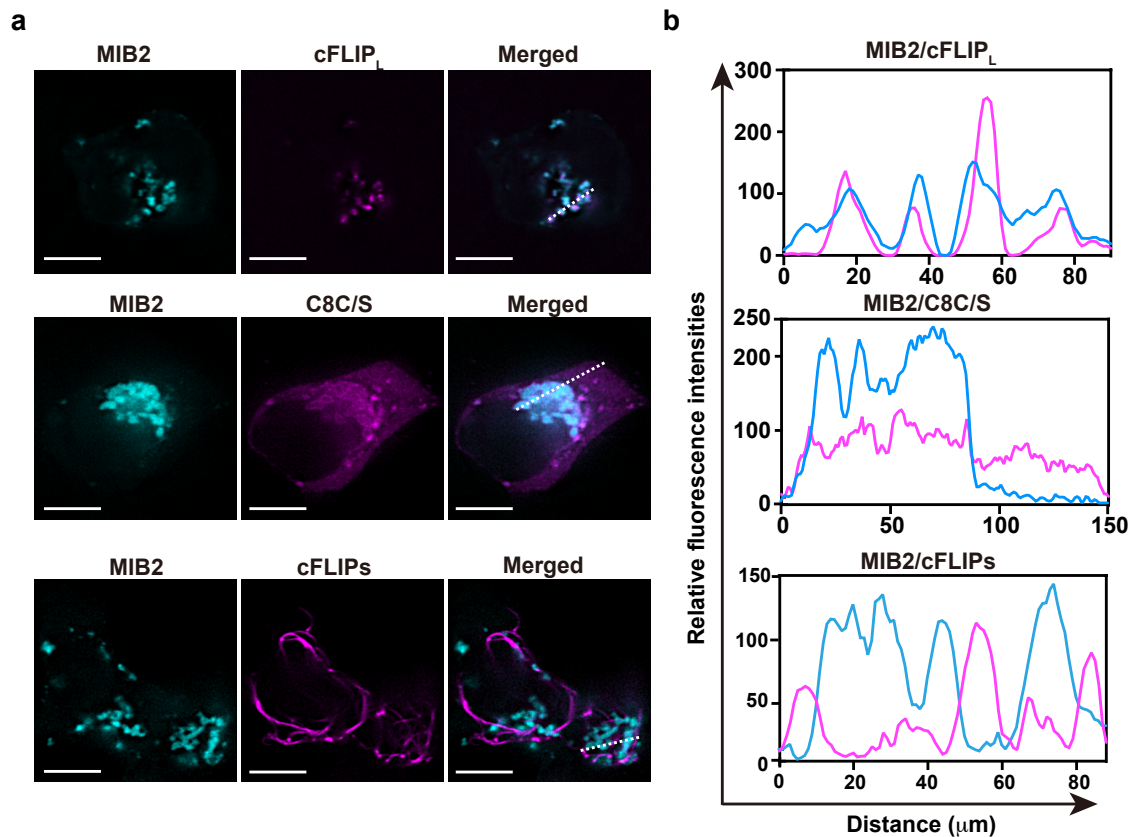

**Supplementary Fig. 2 MIB2 colocalizes with cFLIP<sub>L</sub>, but not cFLIPs or caspase 8.**

**a, b** HEK293 cells were co-transfected with GFP-MIB2 along with DsRed-cFLIP<sub>L</sub>, DsRed-cFLIPs, or DsRed-C8C/S. Cellular localization of the indicated proteins was analyzed by DeltaVision (**a**). C8C/S indicates a protease-inactive mutant of caspase 8. Relative fluorescence intensities on the dotted white lines (merged images) were analyzed by Image J and are expressed as cyan (MIB2) and magenta lines (cFLIP<sub>L</sub>, C8C/S, and cFLIPs), respectively (**b**). At least 5 cell images per transfection were collected. Scale bar, 10 μm. Results are representative of two or three independent experiments.

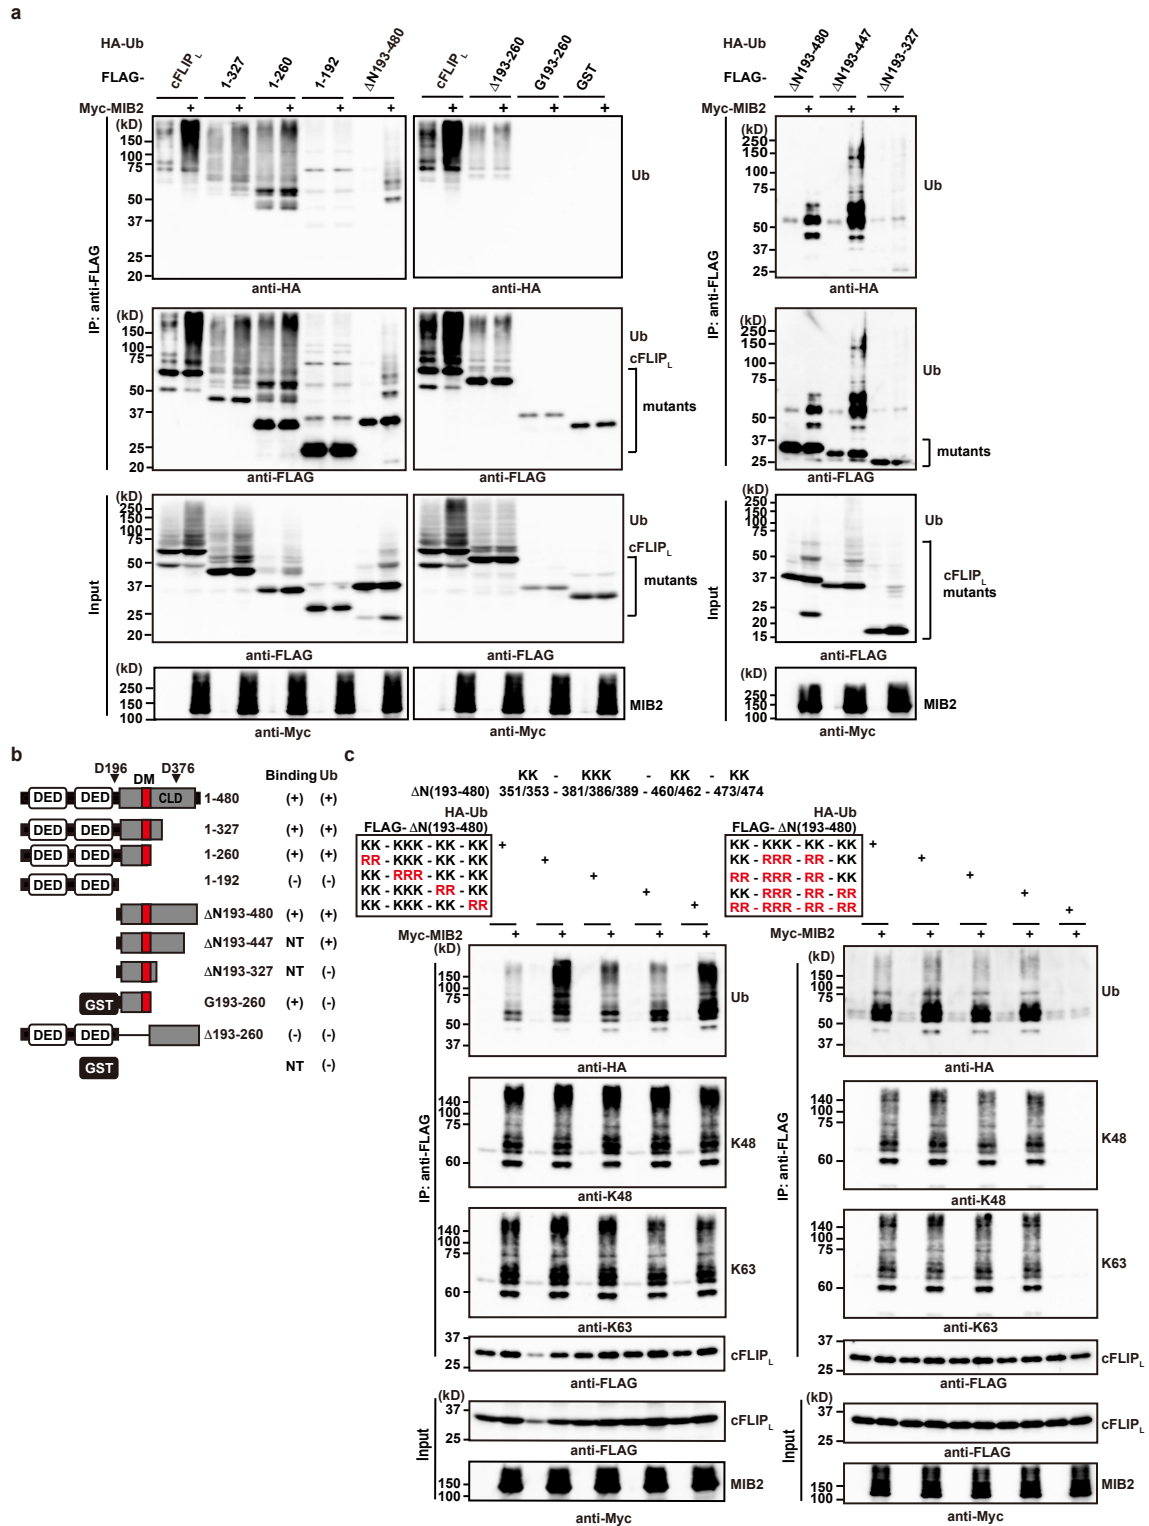

**Supplementary Fig. 3 MIB2 ubiquitylates multiple sites of cFLIP<sub>L</sub>.** a HEK293 cells were transfected with cFLIP<sub>L</sub> or deletion mutants of cFLIP<sub>L</sub> containing indicated amino acids along with or without MIB2 and HA-Ub. At 24 hours after transfection, cell lysates were immunoprecipitated with anti-FLAG antibody, ubiquitylation of cFLIP<sub>L</sub>



and its mutants was analyzed by immunoblotting with the indicated antibodies. Protein expression was verified by immunoblotting. **b** Diagrams of cFLIP<sub>L</sub> and its deletion mutants, and their binding to MIB2 and ubiquitylation. A deletion mutant containing the indicated amino acids was expressed as GST fusion protein with N-terminal FLAG tag (G193-260), since small polypeptides might be easily degraded in the cells. DED, death effector domain; DM, a docking site for MIB2; CLD, caspase-like domain; GST, glutathione S-transferase. D196 and D376 indicate aspartic acids cleaved by activated caspase 8. **c** MIB2 ubiquitylates multiple lysines in the C-terminal portion of cFLIP<sub>L</sub>. ΔN193-480 and its lysine to arginine (KR) mutants at the indicated positions were transfected and analyzed as in **a**. Each number indicates lysine residues' positions, and lysines replaced with arginines are highlighted with red characters. MT indicates the mutants of ΔN193-480. Results are representative of two or three independent experiments.

**a**

|                           |     |     |   |     |     |     |   |   |   |   |   |   |   |   |   |   |   |   |
|---------------------------|-----|-----|---|-----|-----|-----|---|---|---|---|---|---|---|---|---|---|---|---|
|                           | 351 | 353 |   | 381 | 386 | 389 |   |   |   |   |   |   |   |   |   |   |   |   |
| <i>Homo sapiens</i>       | G   | K   | P | K   | M   | F   | F | I | M | K | N | V | E | F | K | A | Q | K |
| <i>Pan troglodytes</i>    | G   | K   | P | K   | M   | F   | F | I | M | K | N | V | E | F | K | A | Q | K |
| <i>Bos tarus</i>          | G   | K   | P | K   | L   | F   | F | I | V | K | S | A | D | S | K | A | R | Q |
| <i>Canis lupus</i>        | G   | K   | P | K   | L   | F   | F | I | V | N | N | V | E | S | K | A | - | K |
| <i>Rattus rattus</i>      | G   | K   | P | K   | L   | F   | F | I | I | K | N | V | N | S | R | H | L | H |
| <i>Mus musculus</i>       | G   | K   | P | K   | L   | F   | F | I | I | K | N | V | D | S | K | P | L | Q |
| <i>Gallus gallus</i>      | G   | K   | P | K   | L   | F   | F | I | - | K | K | I | I | S | R | A | - | K |
| <i>Xenopus tropicalis</i> | -   | -   | P | K   | I   | F   | F | T | S | R | Q | C | S | N | T | - | - | - |
| <i>Danio rerio</i>        | G   | K   | P | K   | L   | F   | F | I | - | T | V | C | A | N | R | P | - | - |

|                           |     |     |   |     |         |   |   |   |   |   |   |   |   |   |   |   |   |
|---------------------------|-----|-----|---|-----|---------|---|---|---|---|---|---|---|---|---|---|---|---|
|                           | 460 | 462 |   | 468 | 473/474 |   |   |   |   |   |   |   |   |   |   |   |   |
| <i>Homo sapiens</i>       | A   | K   | E | K   | Y       | Y | V | W | L | Q | H | T | L | R | K | K | L |
| <i>Pan troglodytes</i>    | A   | K   | E | K   | Y       | Y | V | W | L | Q | H | T | L | R | K | K | L |
| <i>Bos tarus</i>          | A   | K   | E | R   | Y       | Y | V | W | L | Q | H | T | L | R | K | N | L |
| <i>Canis lupus</i>        | A   | K   | E | R   | Y       | Y | V | W | L | Q | H | T | L | R | K | K | L |
| <i>Rattus rattus</i>      | S   | K   | E | K   | Y       | Y | L | S | L | Q | H | T | L | R | K | K | L |
| <i>Mus musculus</i>       | S   | K   | E | K   | Y       | S | L | S | L | Q | H | T | L | R | K | K | L |
| <i>Gallus gallus</i>      | P   | S   | Q | Q   | Y       | S | L | L | L | Q | H | T | L | R | K | T | L |
| <i>Xenopus tropicalis</i> | K   | K   | E | E   | C       | I | I | Y | Q | Q | H | T | L | R | K | K | L |
| <i>Danio rerio</i>        | -   | -   | D | N   | Y       | Q | L | Q | Q | S | H | T | L | R | K | K | L |

**b**

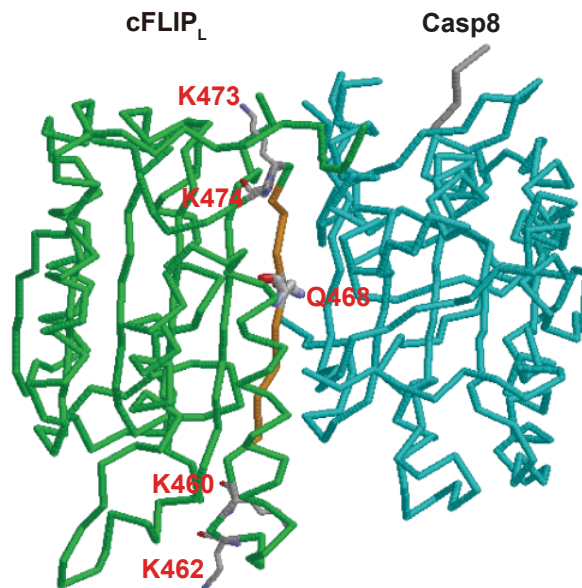

**Supplementary Fig. 4 MIB2 ubiquitylates multiple sites of cFLIP<sub>L</sub>.** **a** Alignment of C-terminal caspase-like domain of cFLIP<sub>L</sub> in various species. Red boxes highlight conserved amino acids among species. Each number indicates the position of the amino acids of human cFLIP<sub>L</sub>. **b** The dimerization interface of C-terminal domains of cFLIP<sub>L</sub> and caspase 8 (adopted from PDB ID codes 3H11) is visualised by RasMol (<http://www.openrasmol.org>). β6-strand of cFLIP<sub>L</sub> is indicated by orange. Red characters indicate four ubiquitylated lysine residues and Q468.

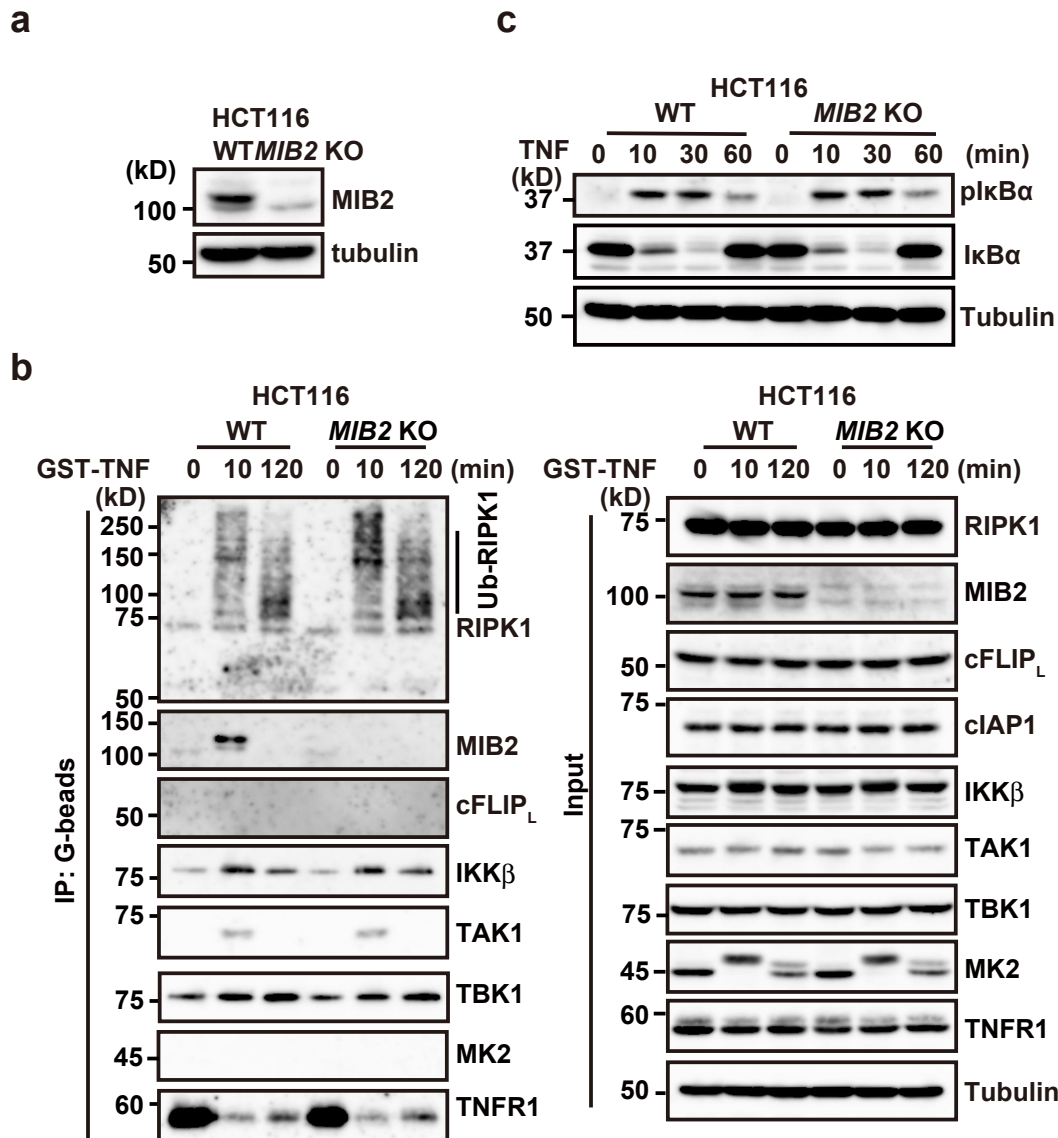

**Supplementary Fig. 5 TNF-induced complex I formation is not altered in WT and MIB2 KO HCT 116 cells.** **a** Generation of *MIB2* KO HCT116 cells. Expression of *MIB2* was verified by immunoblotting. **b** WT and *MIB2* KO HCT116 cells were stimulated with GST-TNF (1  $\mu$ g/ml) for the indicated times, and TNFR-containing complex I precipitated with glutathione-Sepharose. Precipitated proteins were analysed by immunoblotting with the indicated antibodies. Protein expression was verified by immunoblotting with the indicated antibodies. **c** WT and *MIB2* KO HCT116 cells were stimulated with TNF for the indicated times, and phosphorylation and degradation of  $I\kappa B\alpha$  were analysed by immunoblotting with the indicated antibodies. All results are representative of two or three independent experiments.

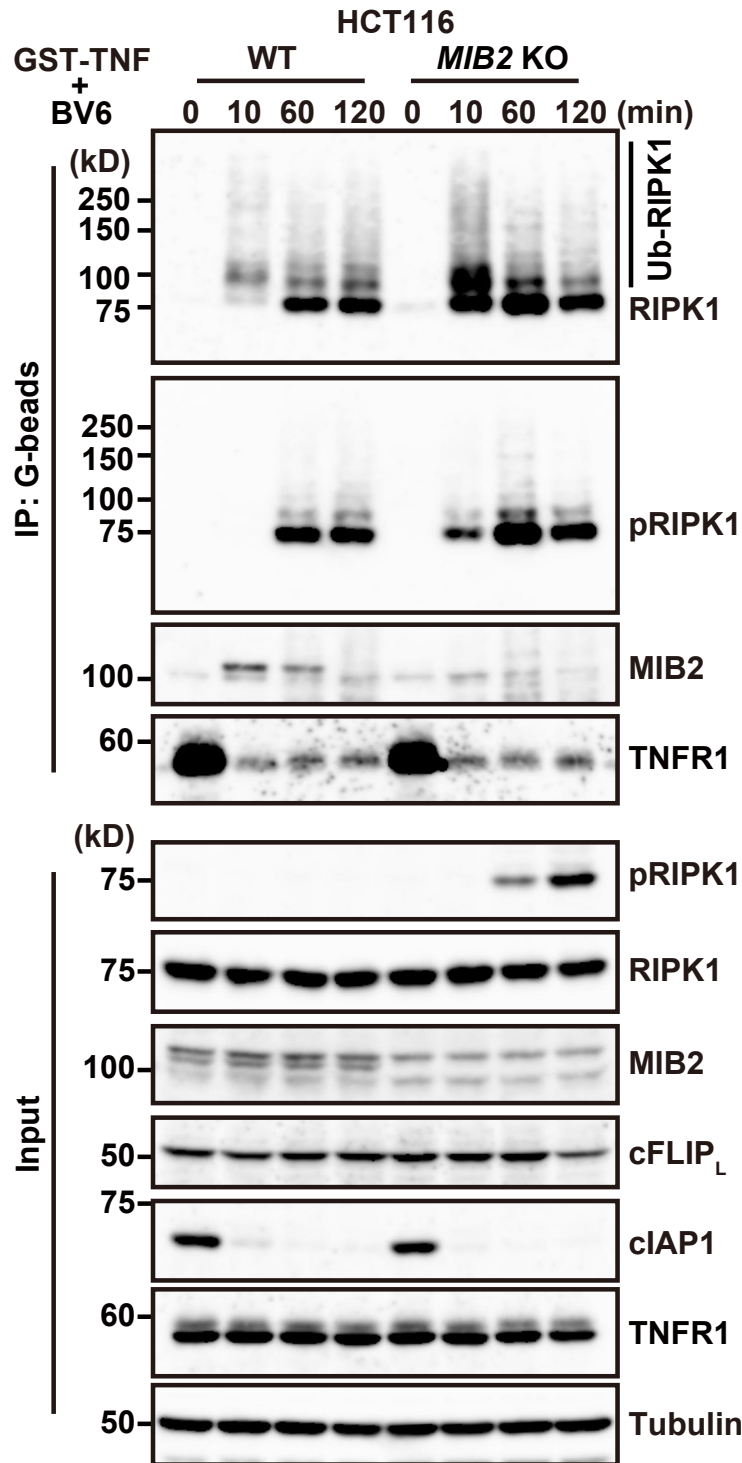

**Supplementary Fig. 6** TNF induces phosphorylation of RIPK1 in *MIB2* KO cells in the presence of IAP inhibitor. WT and *MIB2* KO HCT116 cells were stimulated with GST-TNF (1  $\mu$ g/ml)/BV6 (0.1  $\mu$ M) for the indicated times, and TNFR-containing complex was precipitated and analysed as in Fig. 6f. Asterisks indicated cross-reacted bands. All results are representative of two or three independent experiments.

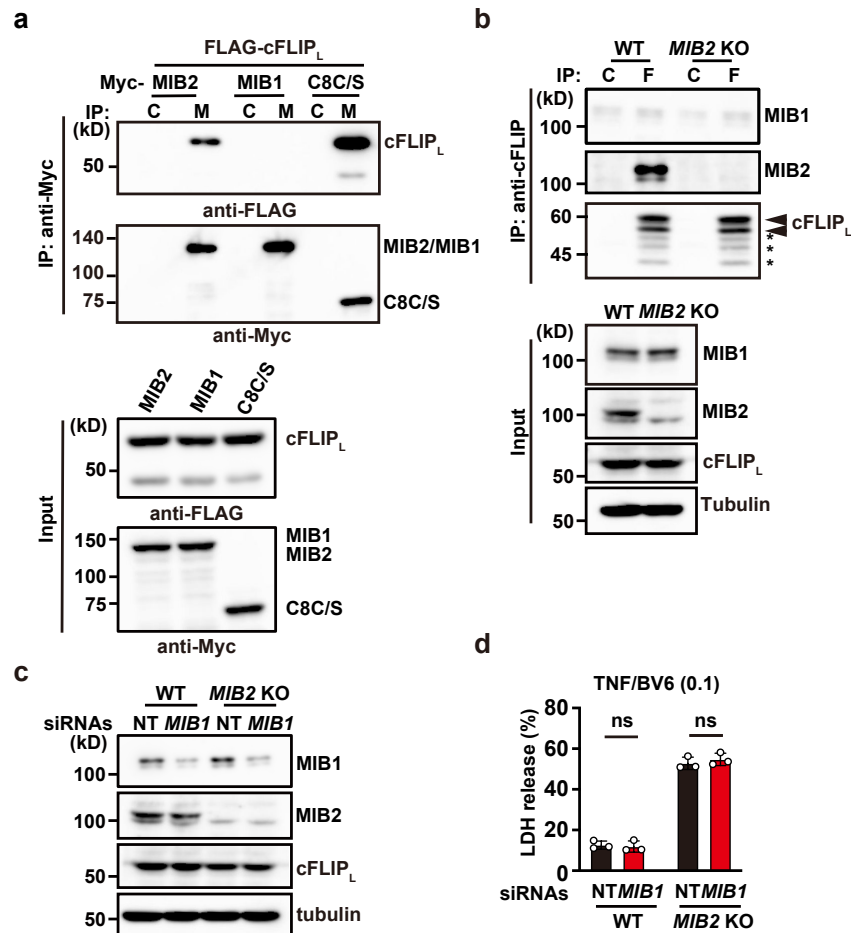

**Supplementary Fig. 7 cFLIP<sub>L</sub> does not bind to MIB1.** **a** HEK293 cells were transfected with the indicated expression vectors. Cell lysates were immunoprecipitated with control Ig (C) or anti-Myc (M) antibodies, co-immunoprecipitated proteins were analyzed by immunoblotting with anti-FLAG antibody. Protein expression was verified by the indicated antibodies using cell lysates. C8C/S indicates a protease-inactive mutant of caspase 8. **b** WT and *MIB2* KO HeLa cells were immunoprecipitated with control Ig (C) or anti-cFLIP (F) antibody. Immunoprecipitates were analyzed by immunoblotting with anti-MIB1 or anti-MIB2 antibodies. Protein expression was verified by the indicated antibodies. The upper and lower arrowheads indicate modified and unmodified cFLIP<sub>L</sub>, respectively. Asterisks indicate degraded bands of cFLIP<sub>L</sub>. **c** WT and *MIB2* KO HeLa cells were transfected with non-target (NT) or *MIB1* siRNAs. Protein expression was verified by immunoblotting with the indicated antibodies. **d** WT and *MIB2* KO HeLa cells were treated with the indicated siRNAs. Sixteen hours after transfection, cells were stimulated with TNF (10 ng/ml) and BV6 (0.1 μM) for 8 hours. Cell death was determined by LDH release assay. Results are mean ± SD of triplicate samples. Unpaired two-tailed Student *t*-test. ns, not significant. All results are representative of two independent experiments.

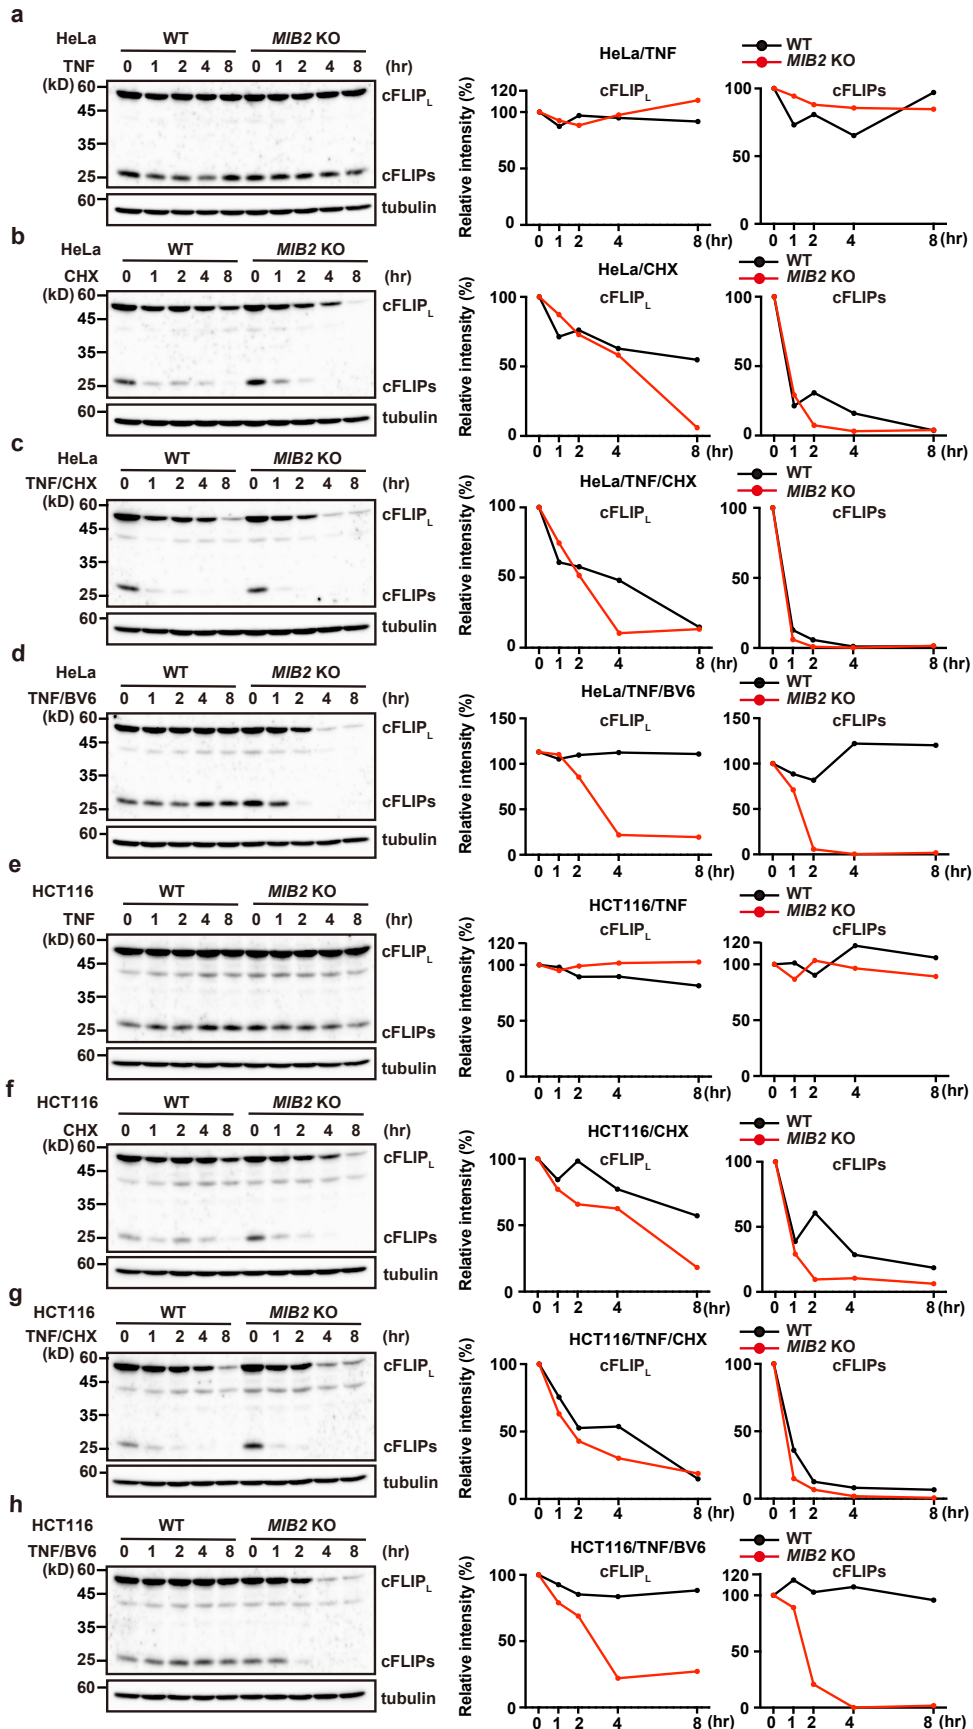

**Supplementary Fig. 8 MIB2 does not promote degradation but rather increases the stability of cFLIP<sub>L</sub>.** **a-d** WT and *MIB2* KO HeLa were stimulated with TNF (1 ng/ml) **(a)**, CHX (2.5  $\mu$ g/ml) **(b)**, TNF (1 ng/ml)/CHX (2.5  $\mu$ g/ml) **(c)**, or TNF (10 ng/ml)/BV6 (0.1  $\mu$ M) **(d)** for the indicated times, and expression of cFLIP<sub>L</sub> and cFLIPs was analyzed by immunoblotting with anti-cFLIP antibody. Signal intensities of cFLIP<sub>L</sub>, cFLIPs, and tubulin at the indicated times were calculated by Image J and normalized by those of tubulin. Relative intensities of cFLIP<sub>L</sub> and cFLIPs at the indicated times compared to those at time 0 (100%) are plotted. **e-h** WT and *MIB2* KO HCT116 were stimulated with TNF (1 ng/ml) **(e)**, CHX (2.5  $\mu$ g/ml) **(f)**, TNF (1 ng/ml)/CHX (2.5  $\mu$ g/ml) **(g)**, or TNF (10 ng/ml)/BV6 (0.1  $\mu$ M) **(h)** for the indicated times, and analyzed as in **(a)**. Results are representative of two independent experiments.

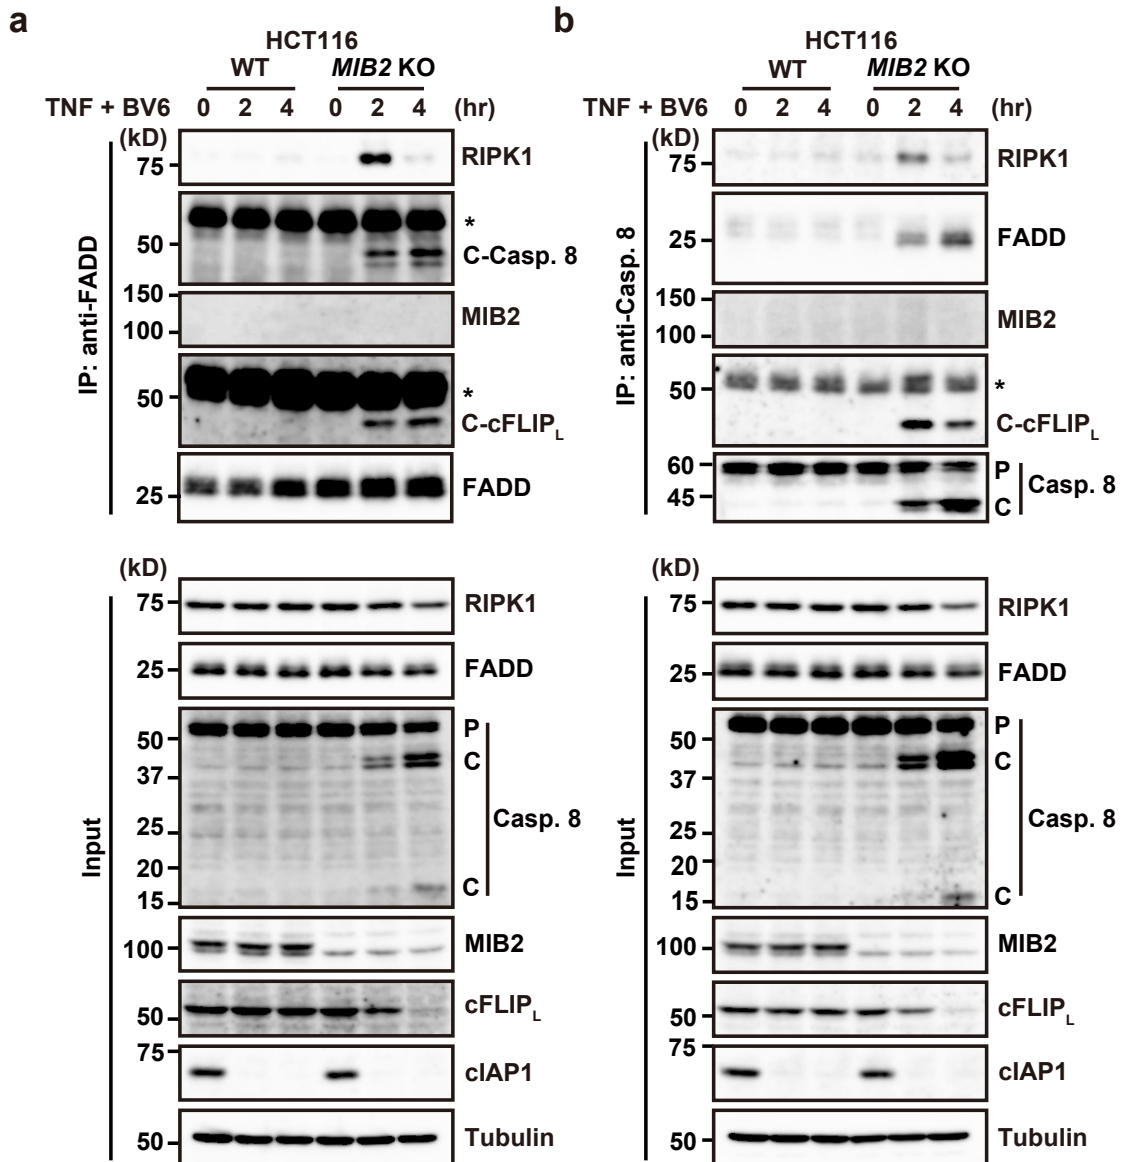

**Supplementary Fig. 9 Complex IIb formation is facilitated in *MIB2* KO HCT116 cells.** **a, b** WT and *MIB2* KO HCT116 cells were stimulated with TNF (10 ng/ml) and BV6 (0.1  $\mu$ M) for the indicated times, and cell lysates were immunoprecipitated with anti-FADD (**a**) or anti-caspase 8 (**b**) antibodies. Immunoprecipitated proteins were analyzed by immunoblotting with the indicated antibodies. Protein expression was verified by immunoblotting with the indicated antibody. \*Cross-reacted band; C-Casp. 8, cleaved caspase 8; C-cFLIP<sub>L</sub>, cleaved cFLIP<sub>L</sub>. P and C indicate proform and cleaved form, respectively. All results are representative of two or three independent experiments.



**a**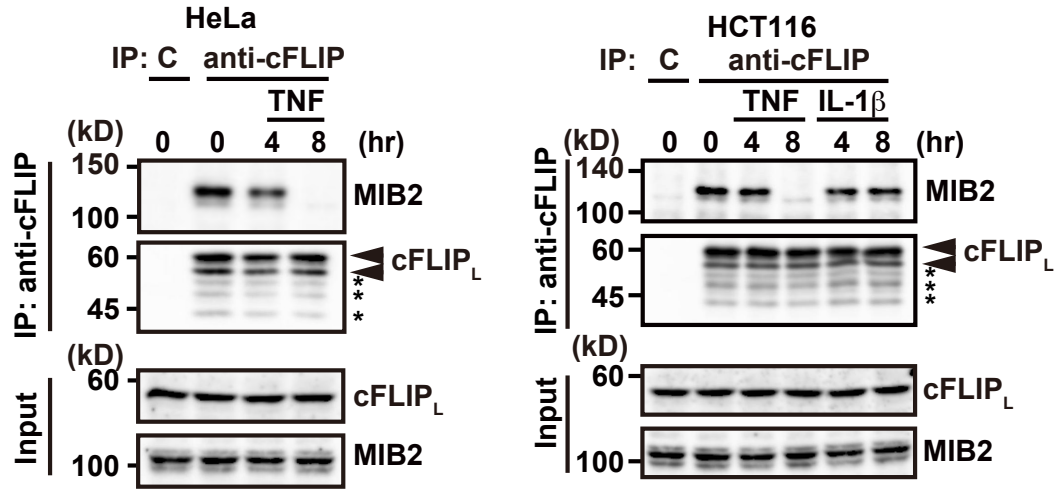**b**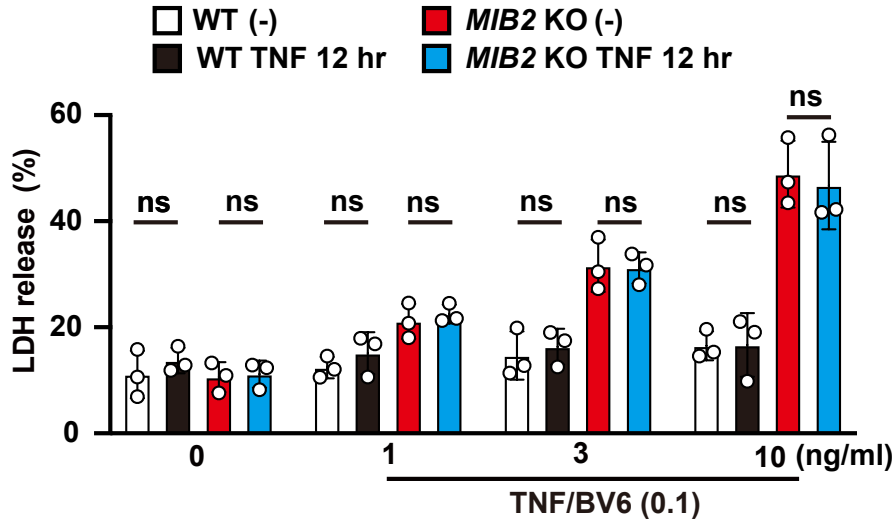

**Supplementary Fig. 10** TNF induces dissociation of the complex of MIB2 and cFLIP<sub>L</sub>. **a** HeLa or HCT116 cells were stimulated with TNF (10 ng/ml) or IL-1β (10 ng/ml) for the indicated times, and cell lysates immunoprecipitated with anti-cFLIP antibody. Immunoprecipitated MIB2 and cFLIP<sub>L</sub> were analysed by immunoblotting with anti-MIB2 and anti-cFLIP antibodies, respectively. The upper and lower arrowheads indicate modified and unmodified cFLIP<sub>L</sub>, respectively. Asterisks indicate degraded bands of cFLIP<sub>L</sub>. Protein expression was verified by immunoblotting with the indicated antibody. **b** WT and *MIB2* KO HeLa cells were pretreated or not with TNF (10 ng/ml) for 12 hours and then stimulated with the indicated concentrations of TNF (ng/ml) and BV6 (0.1 μM) for 8 hours. Cell death was determined by the LDH release assay. Results are mean ± SD of triplicate samples. Unpaired two-tailed Student *t*-test. ns, not significant.

**Fig1c**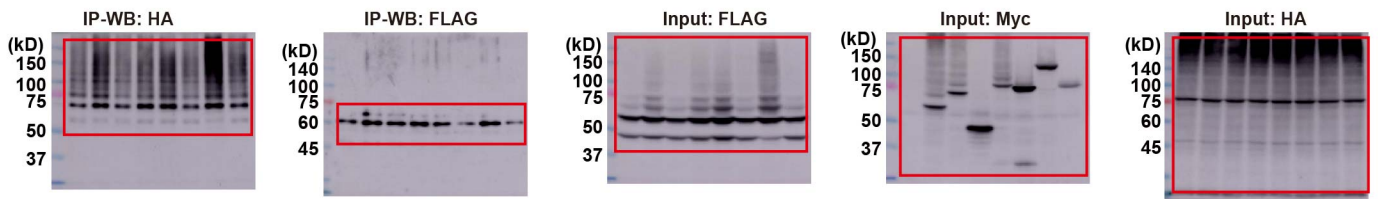**Fig1d**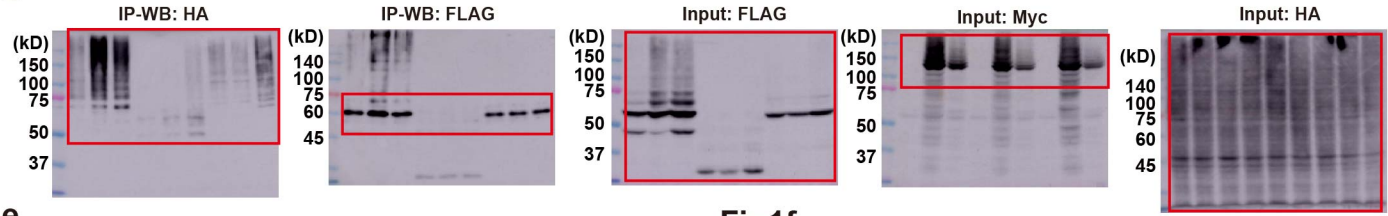**Fig1e**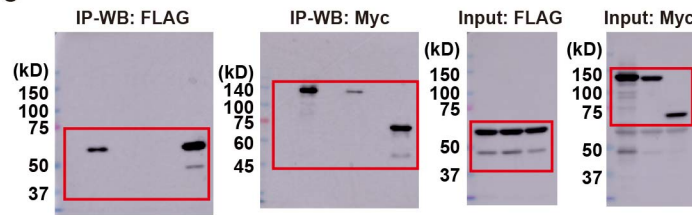**Fig1f**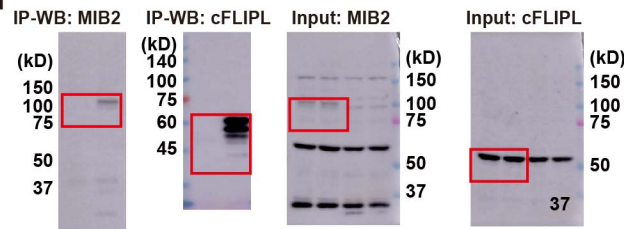**Fig2a**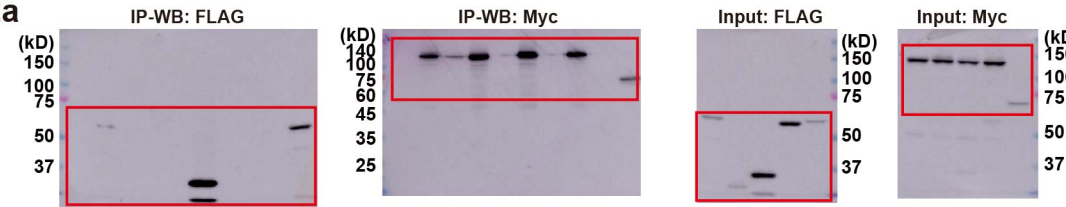**Fig2c**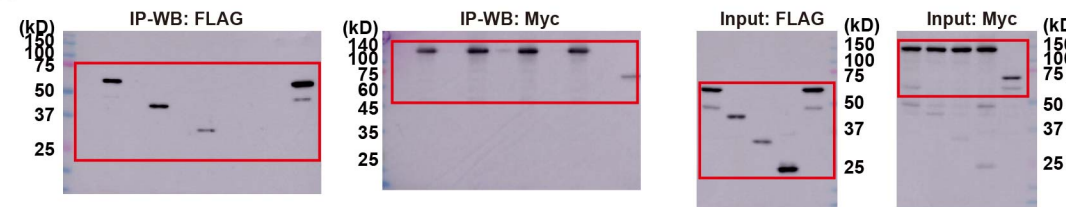**Fig2d**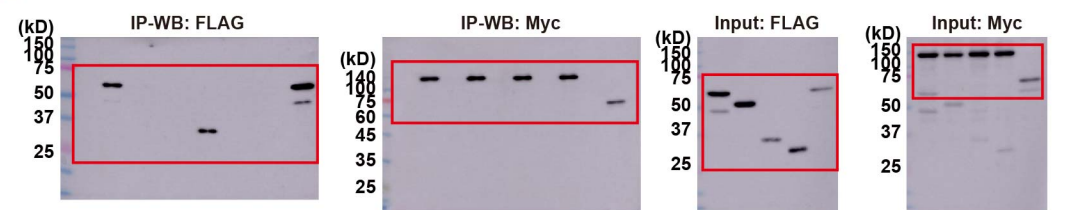**Fig2e**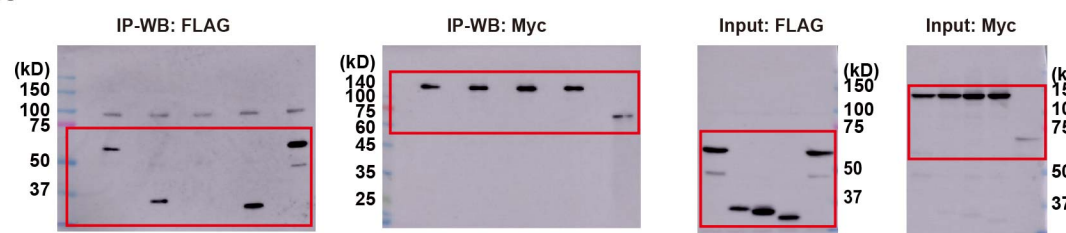**Fig2f**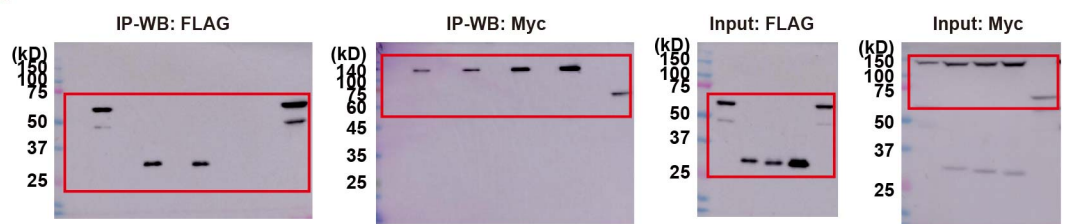

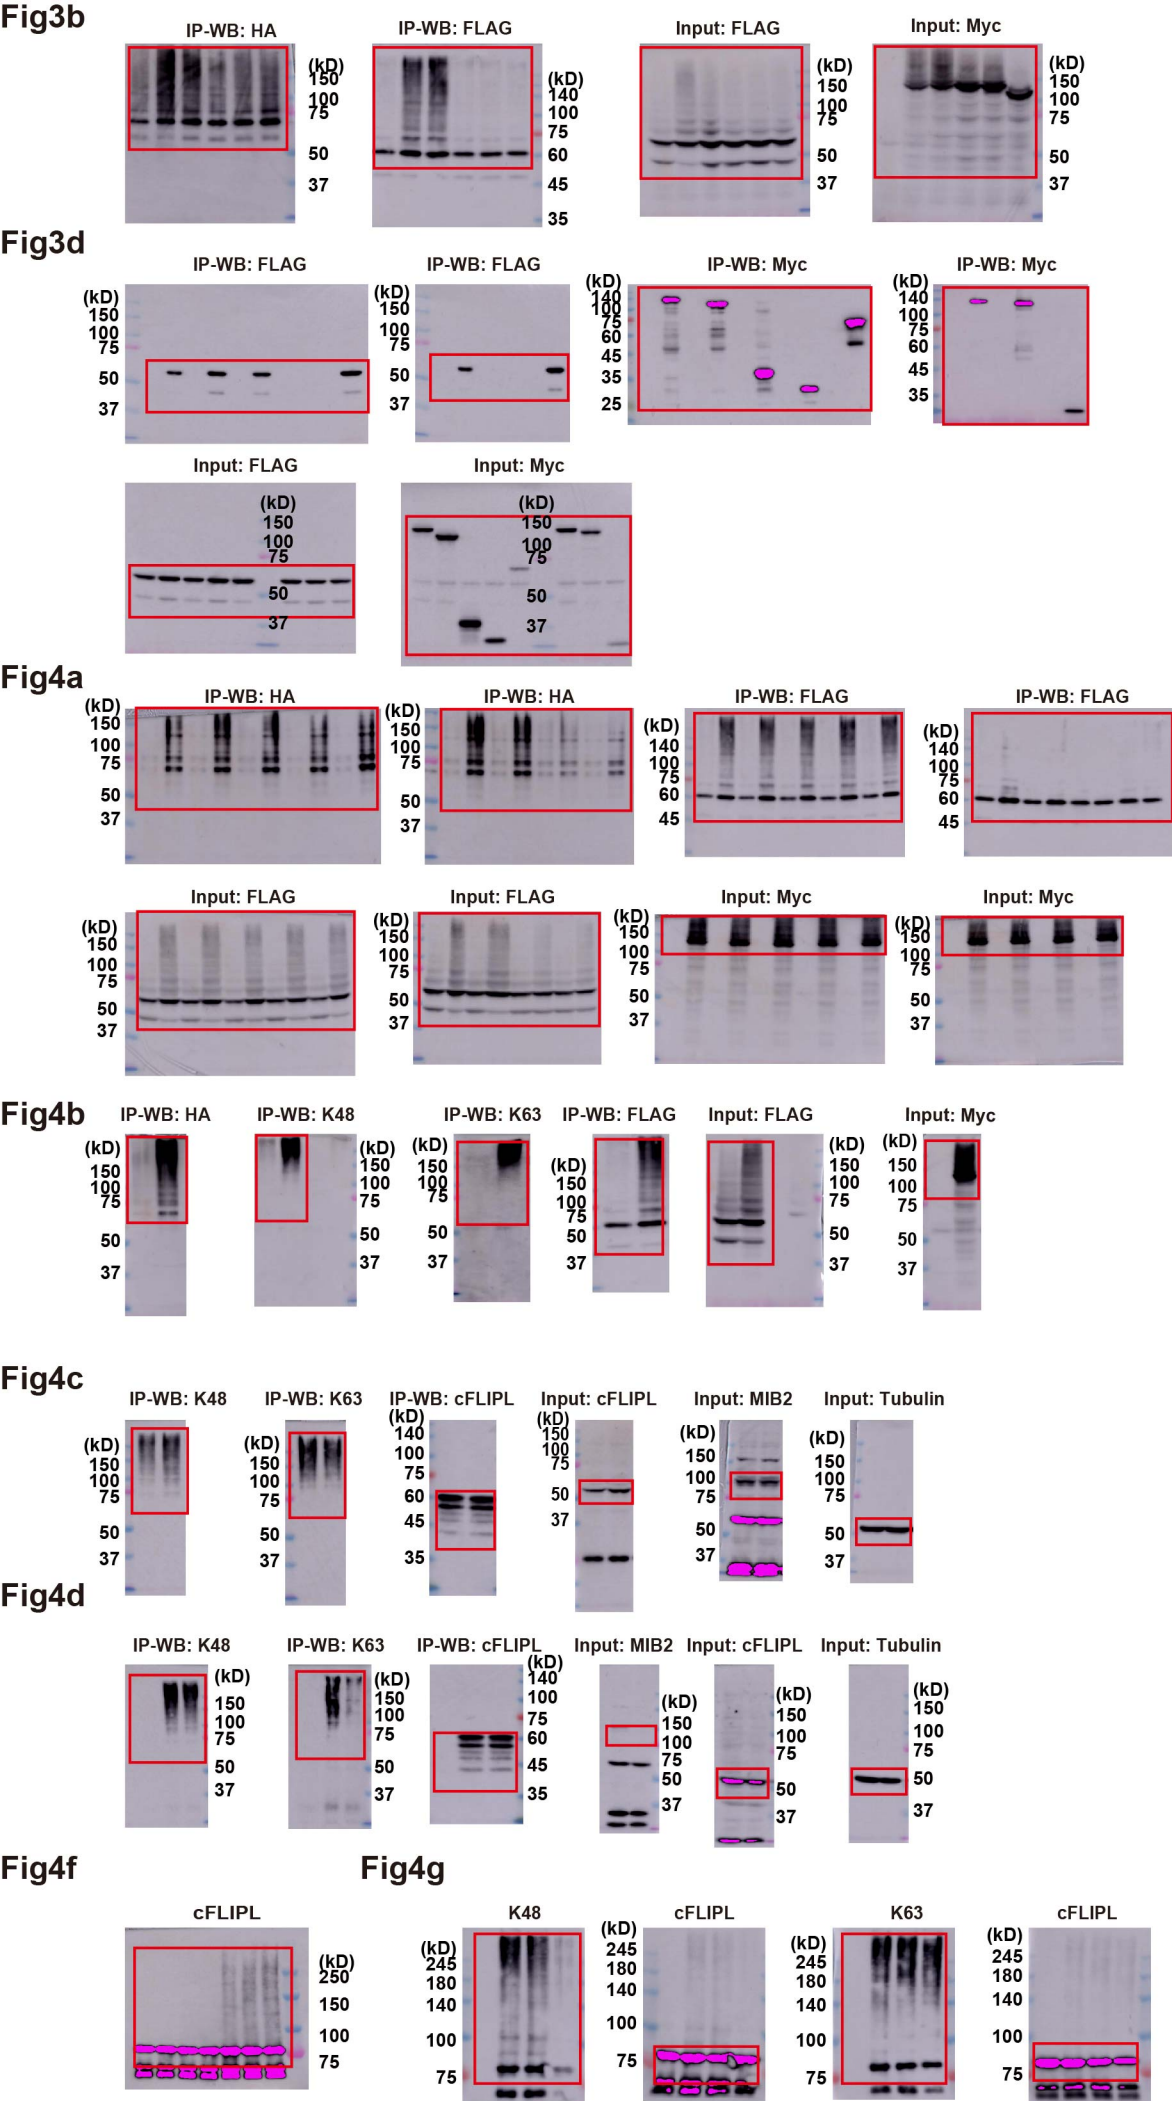



**Fig5a**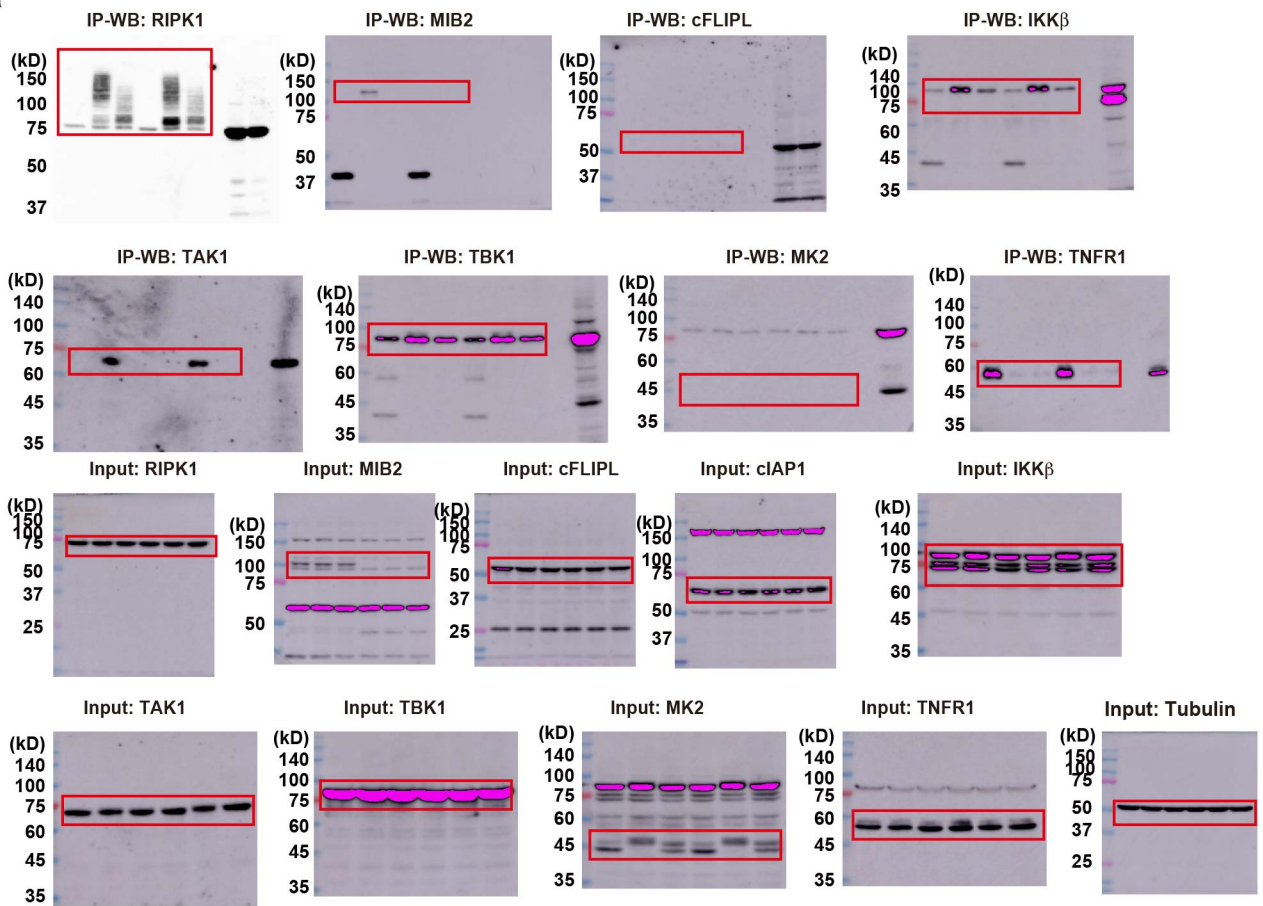**Fig5b**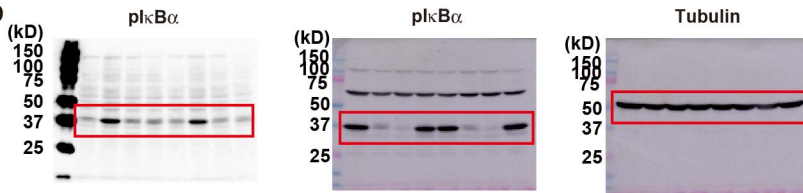**Fig6f**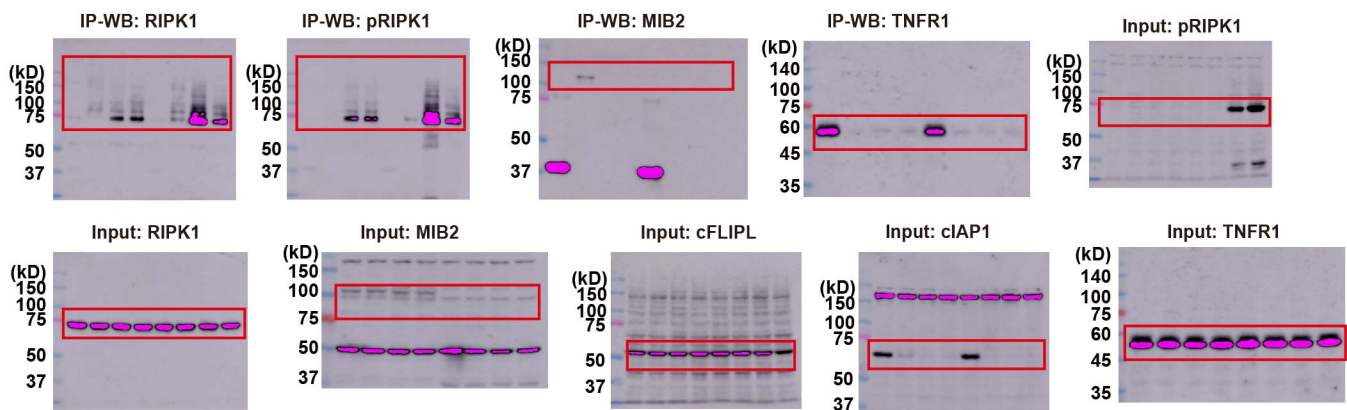**Fig6f**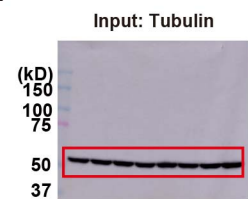**Fig6k**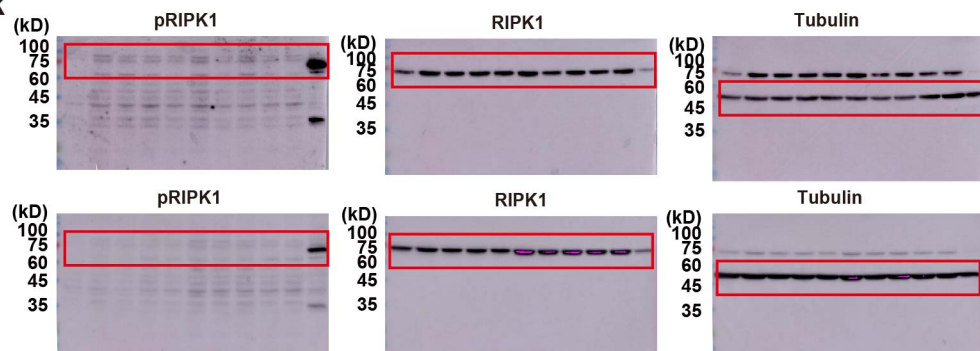



**Fig9a**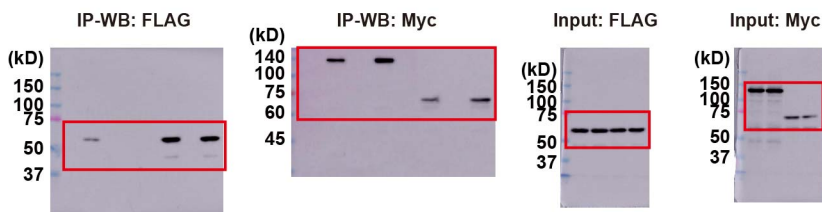**Fig9b**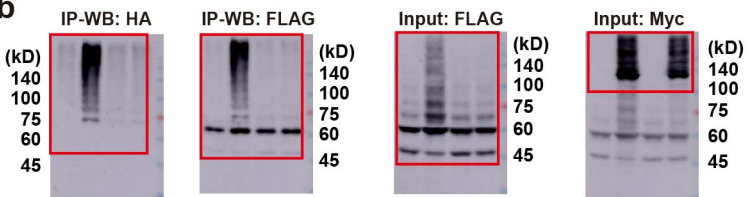**Fig9c**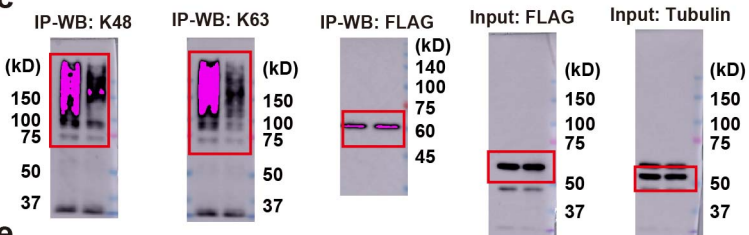**Fig9e**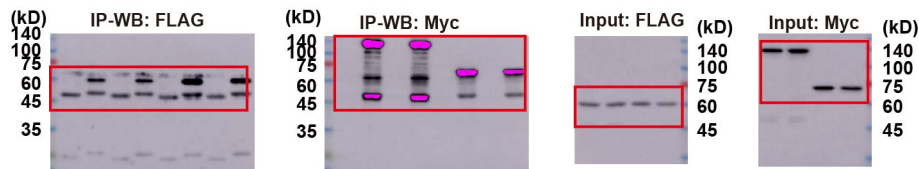**Fig9f**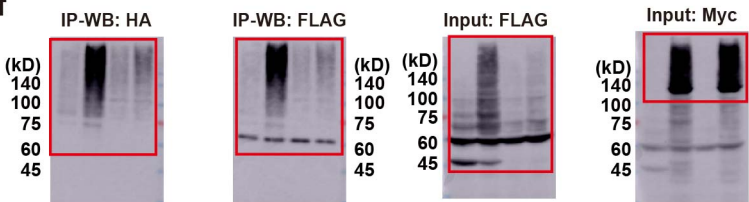**Fig9g**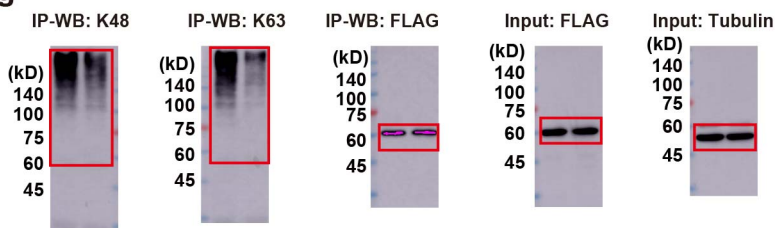**Fig9i**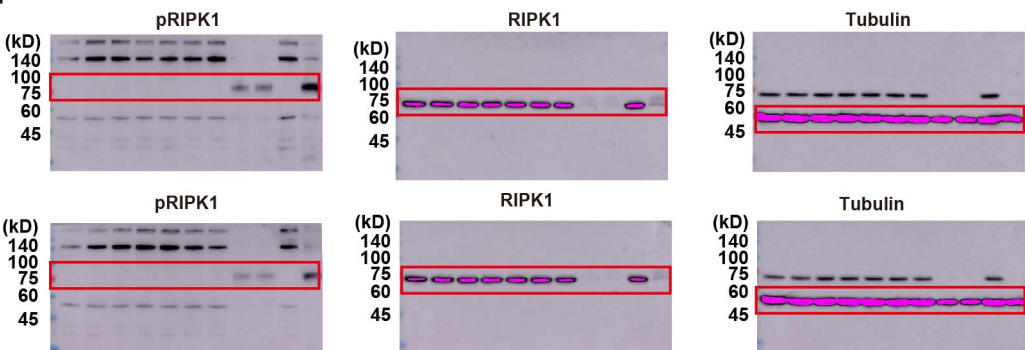



**Fig10a**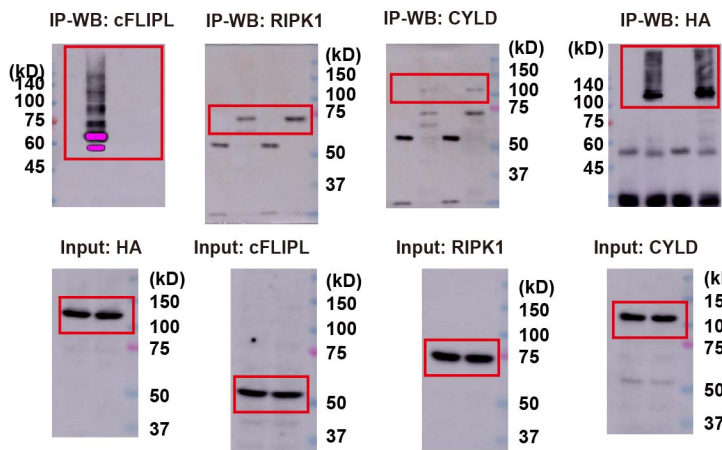**Fig10b**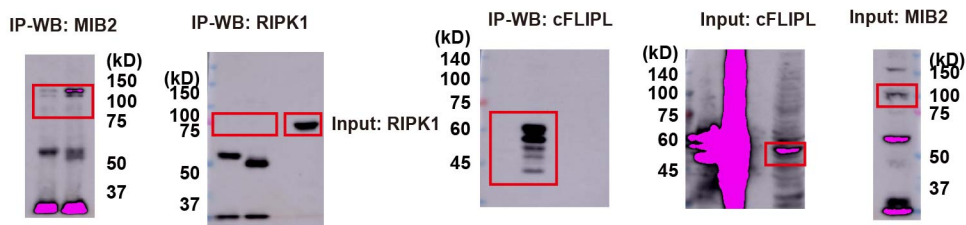**Fig10c**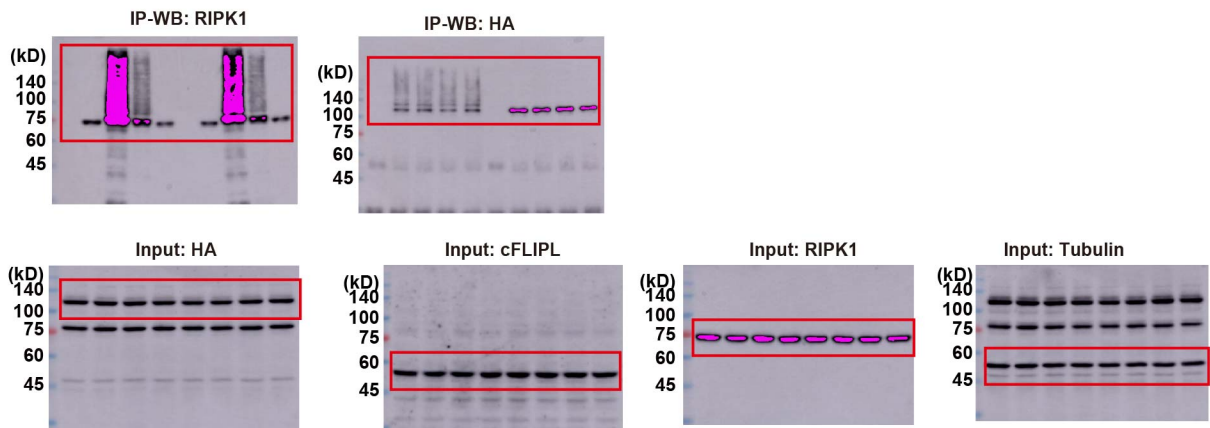**Fig10d**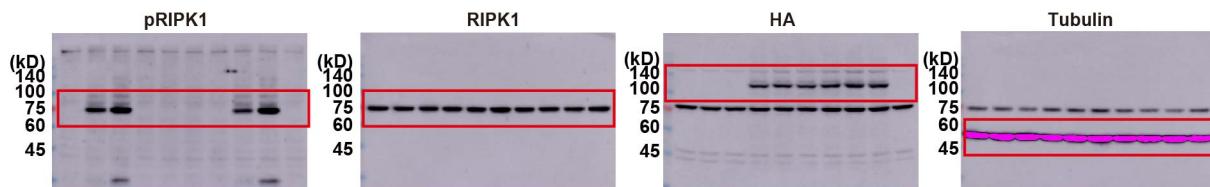**Supplementary Fig1**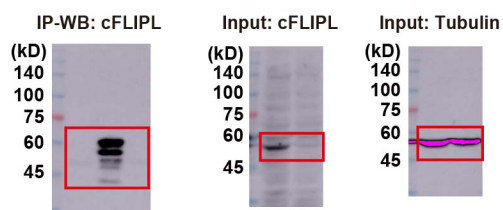

# Supplementary Fig3a

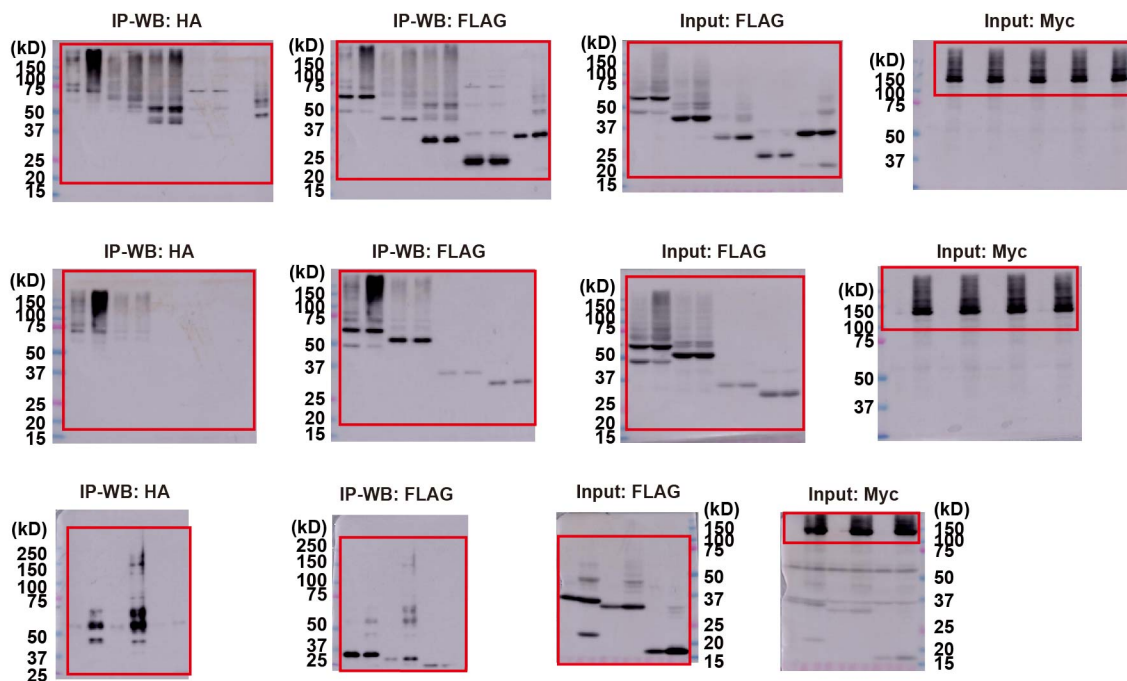

# Supplementary Fig3c

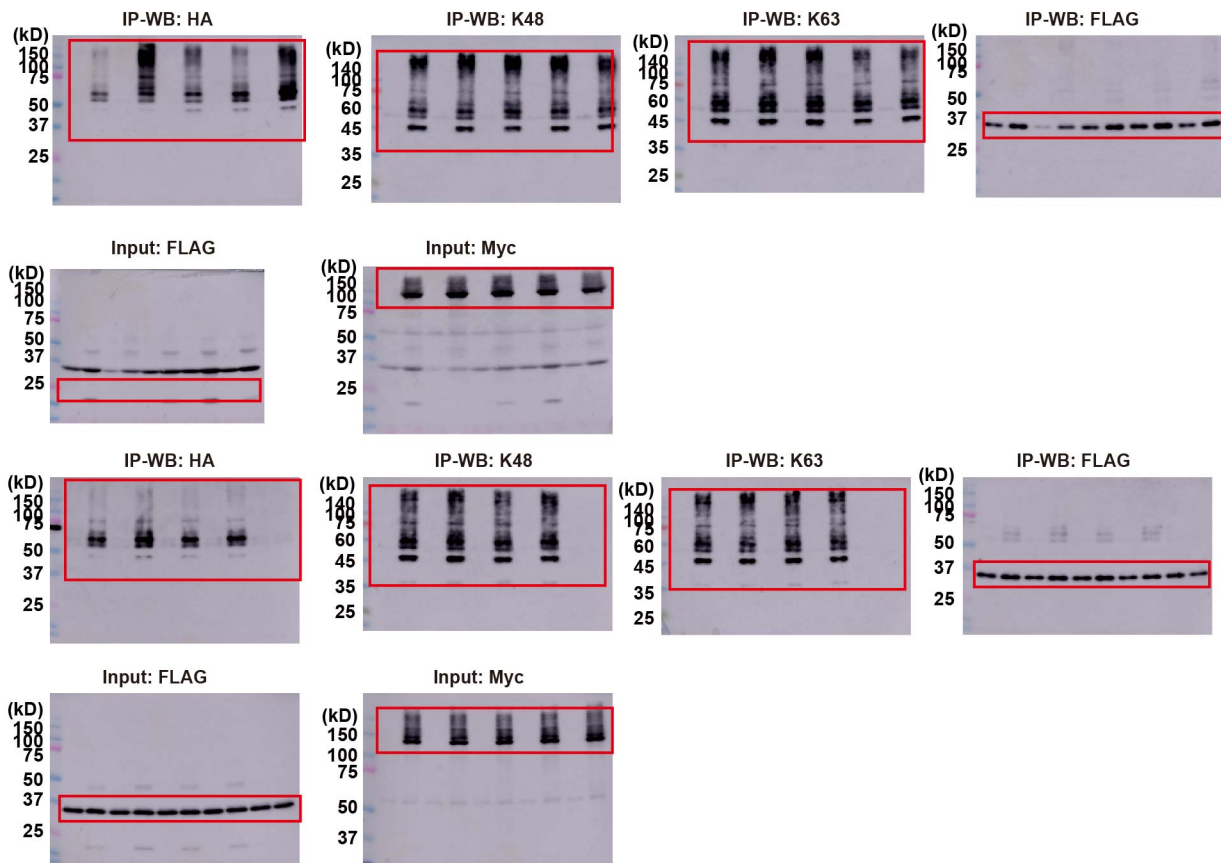



## Supplementary Fig5a

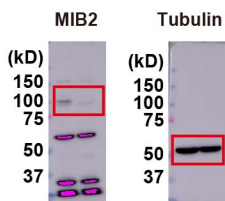

## Supplementary Fig5b

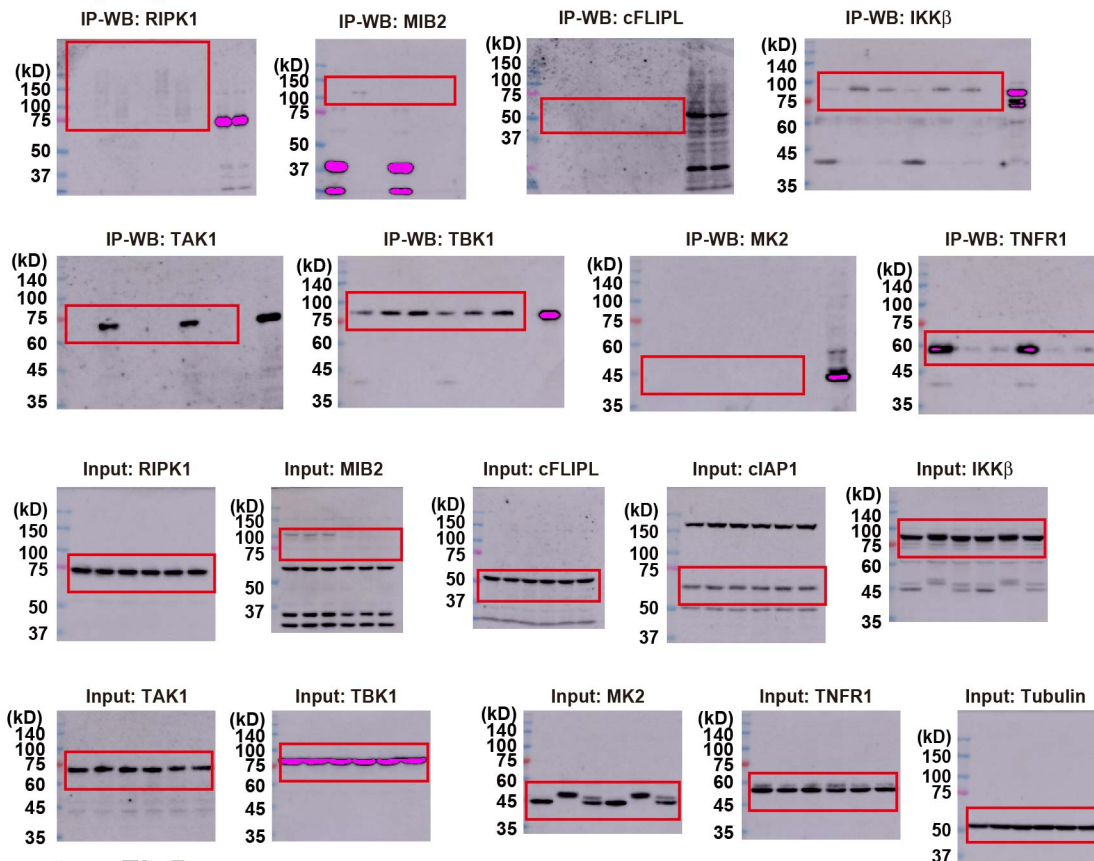

## Supplementary Fig5c

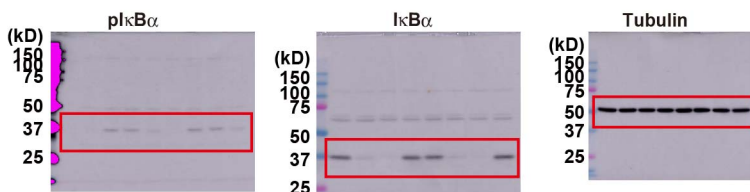

## Supplementary Fig6

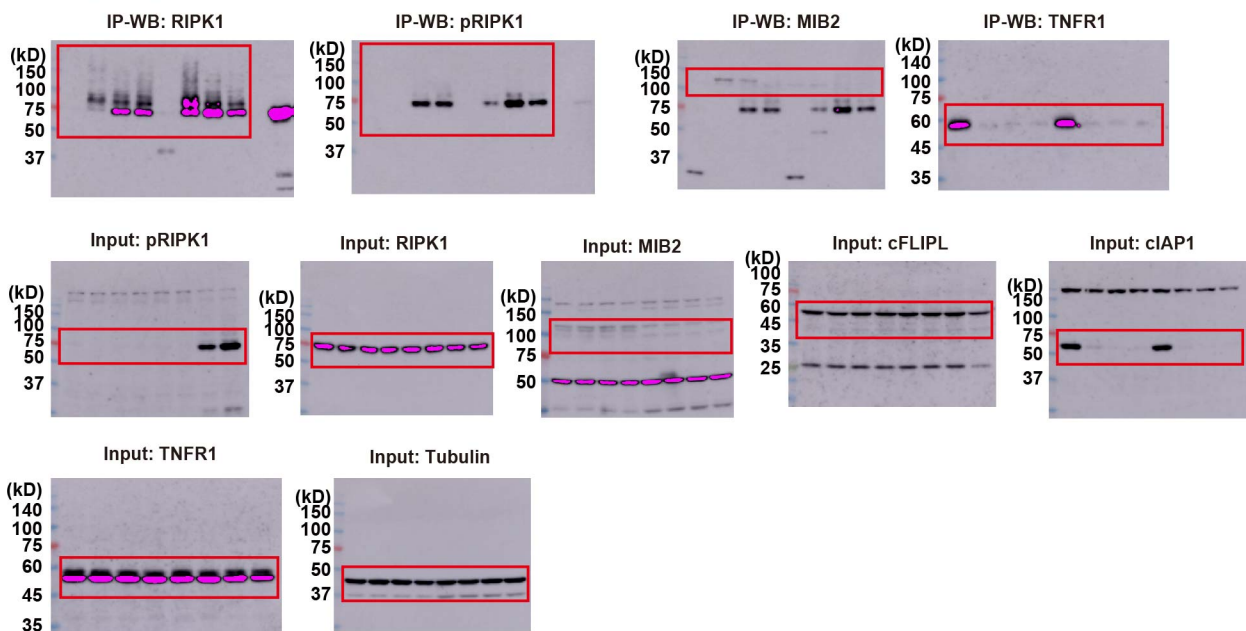

### Supplementary Fig7a

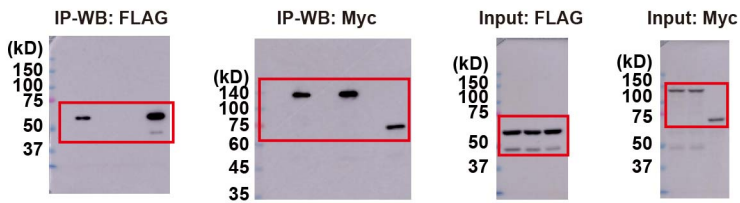

### Supplementary Fig7b

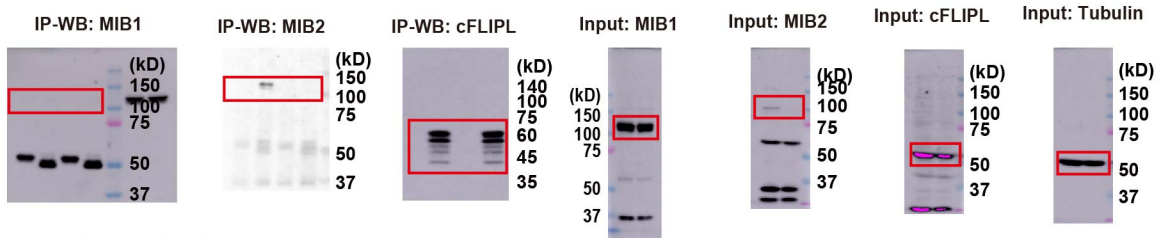

### Supplementary Fig7c

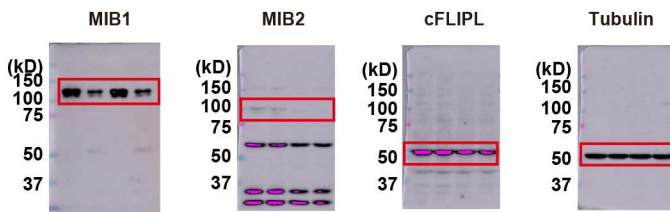

### Supplementary Fig8a-h

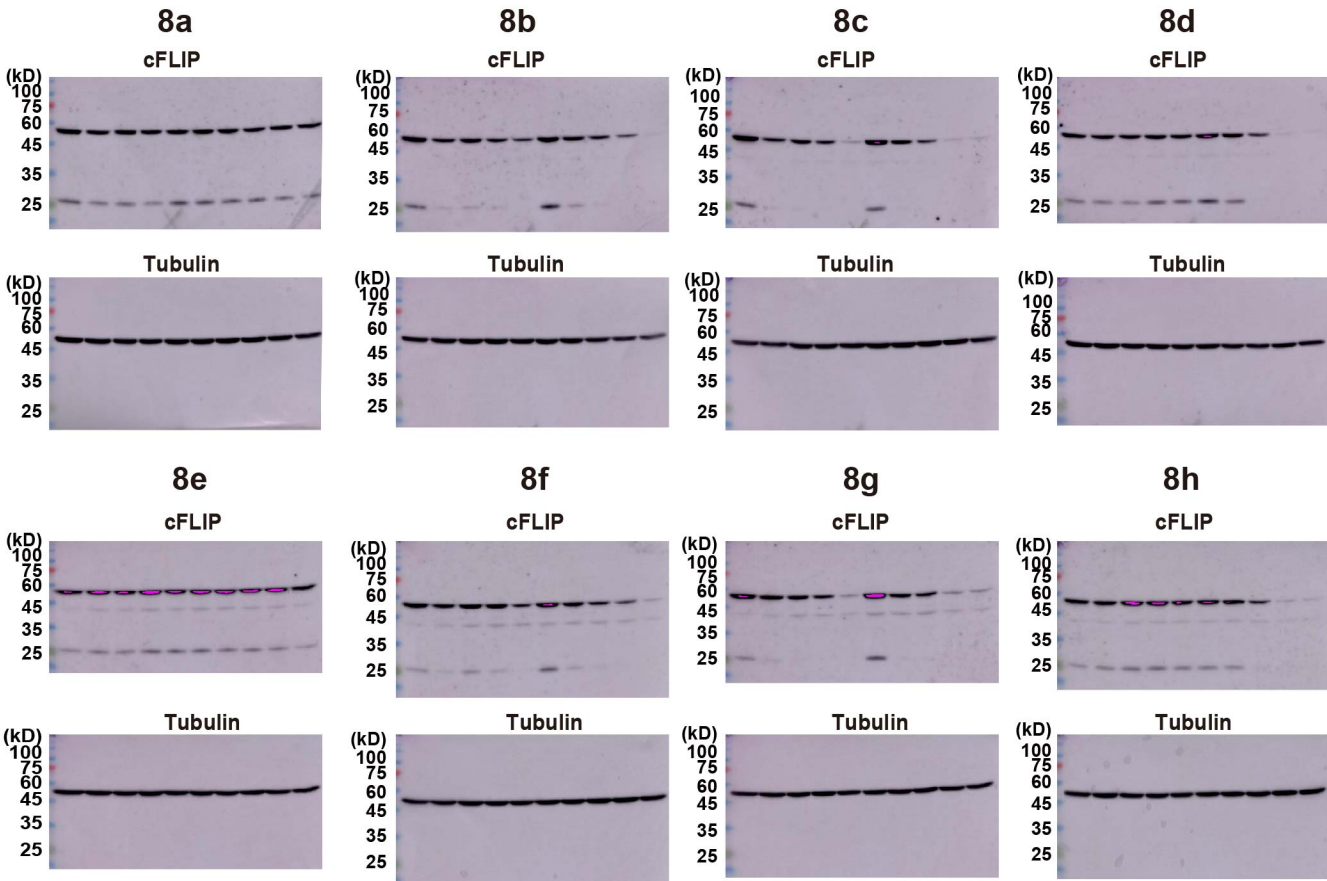

## Supplementary Fig9a

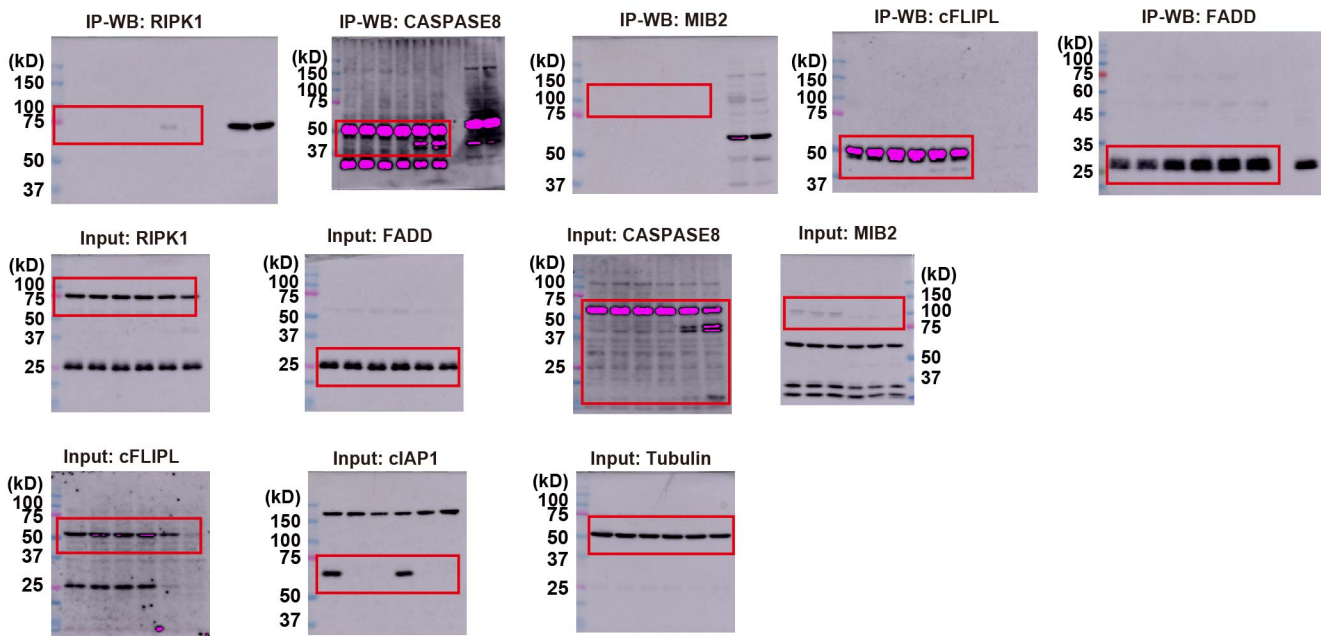

## Supplementary Fig9b

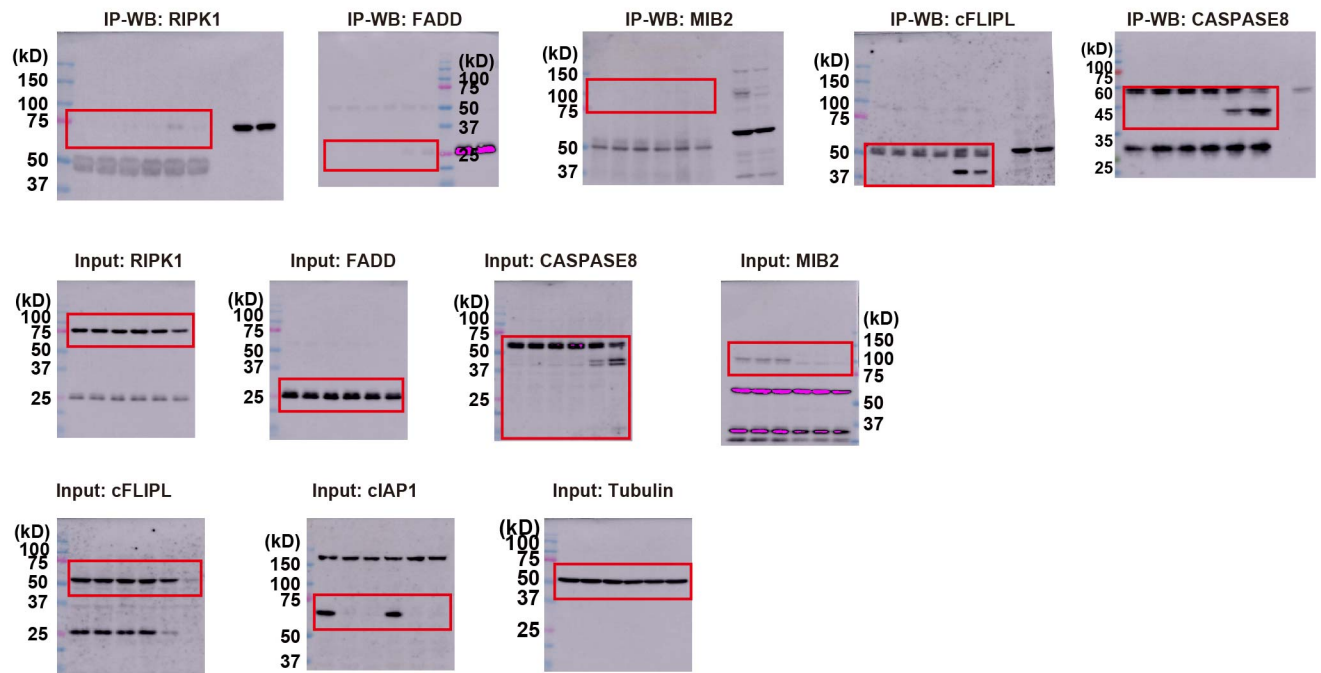

## Supplementary Fig10a

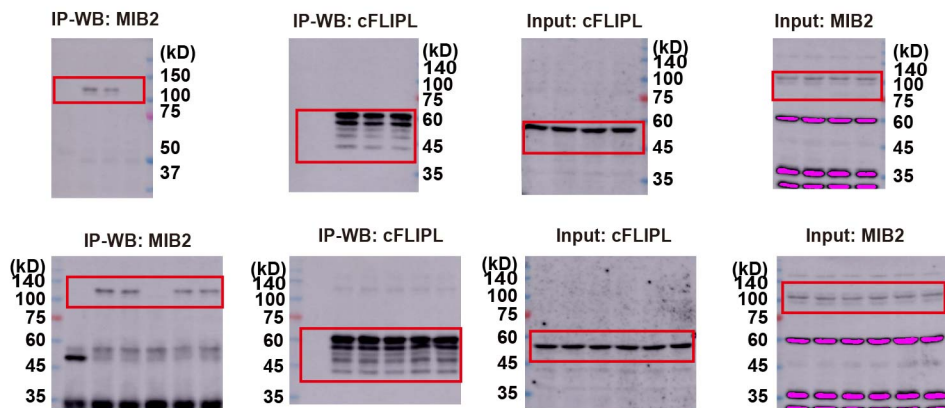

Supplement: 42003_2020_1603_MOESM2_ESM.pdf [file 42003_2020_1603_MOESM2_ESM.pdf]
