# Supplementary material for: MIND bomb 2 prevents RIPK1 kinase activity-dependent and -independent apoptosis through ubiquitylation of cFLIPL
Source: PubMed Central journal article supplement (PMC7815719; doi:10.1038/s42003-020-01603-y), 2021-01-19
Supplement: 42003_2020_1603_MOESM3_ESM.pdf [file 42003_2020_1603_MOESM3_ESM.pdf]

## **Description of Additional Supplementary Files**

File Name: Supplementary Data 1

Description: Binding scores of E3 ligases to cFLIPL.

File Name: Supplementary Data 2

Description: Statistical analysis of the results in Fig. 4.

File Name: Supplementary Data 3

Description: Statistical analysis of the results in Fig. 6.

File Name: Supplementary Data 4

Description: Statistical analysis of the results in Fig. 8.

File Name: Supplementary Data 5

Description: Statistical analysis of the results in Fig. 9.

File Name: Supplementary Data 6

Description: Statistical analysis of the results in Supplementary Fig. 7.

File Name: Supplementary Data 7

Description: Statistical analysis of the results in Supplementary Fig. 8.

File Name: Supplementary Data 8

Description: Statistical analysis of the results in Supplementary Fig. 10.
